# Supplementary material
Source: publisher site journal article supplement (https://www.spandidos-publications.com/7277/downloadSupplementary)

Figure S1. (A) Funnel plot of NLR in overall survival. (B) Funnel plot of NLR in cancer-specific survival. (C) Funnel plot of NLR in recurrence-free survival/progression-free survival. NLR, neutrophil-to-lymphocyte ratio; SE, standard error.

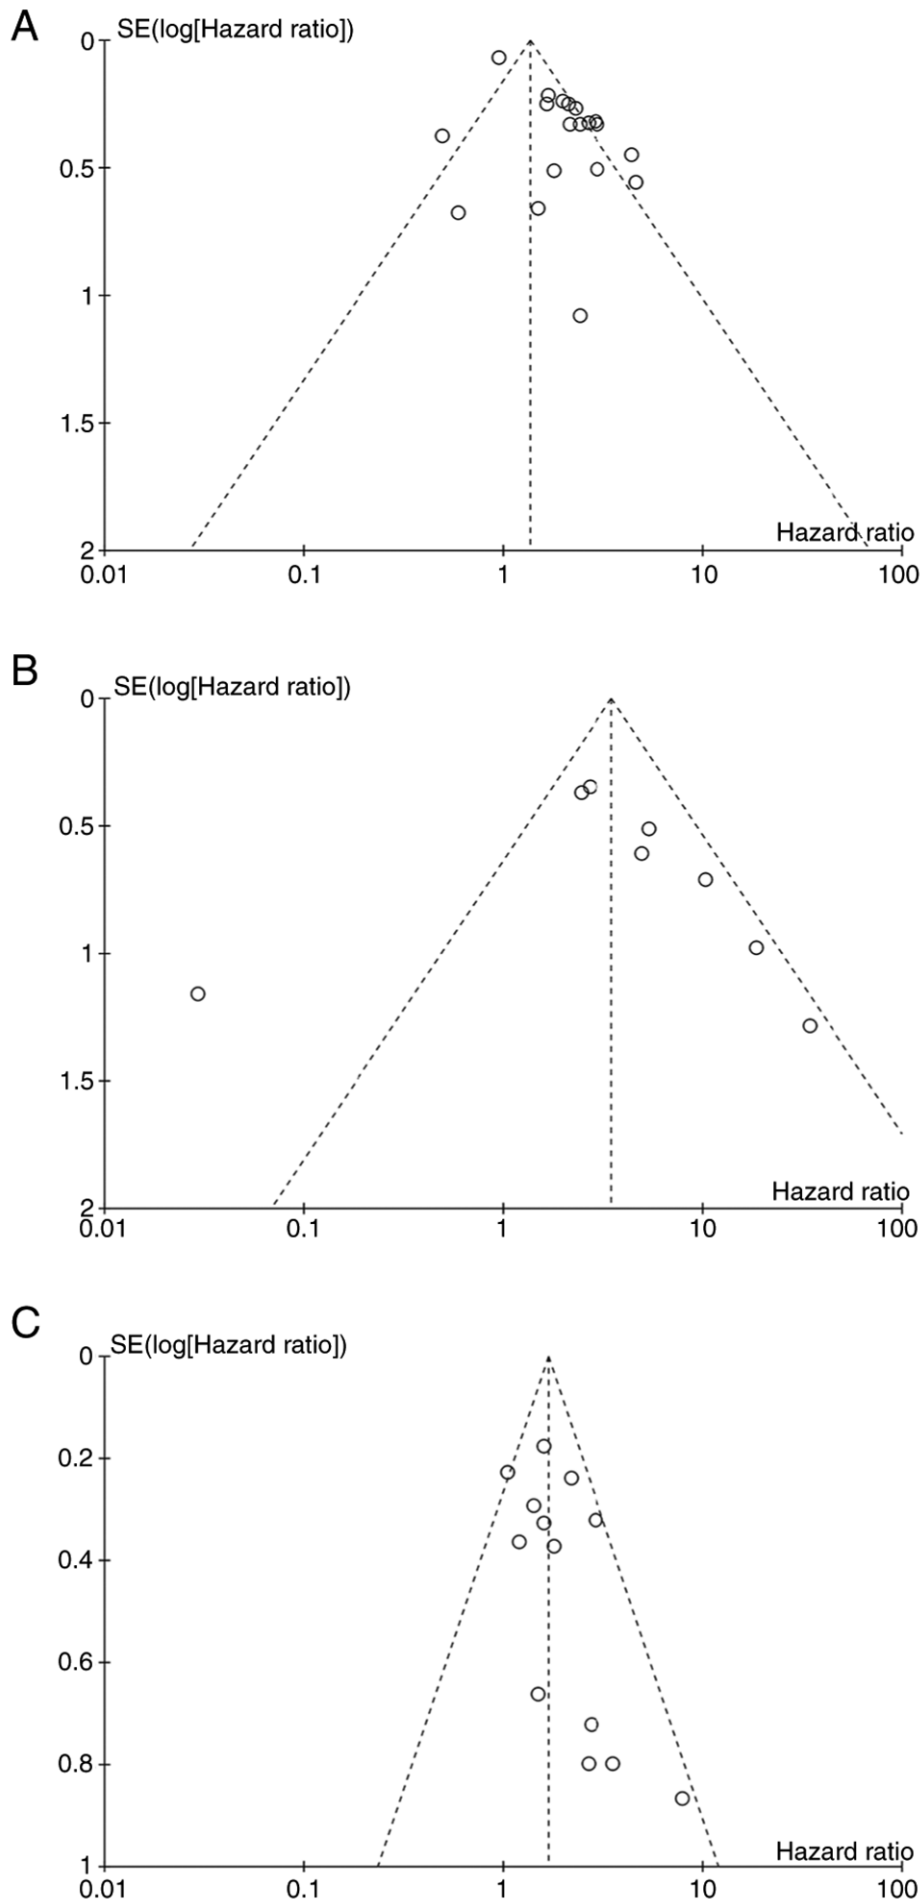

Figure S2. (A) Funnel plot of OS. (B) Funnel plot of overall survival adjusted with trim-and-fill method. (C) CSS funnel plot. (D) CSS funnel plot adjusted with trim-and-fill method. OS, overall survival; CSS, cancer-specific survival; s.e., standard error; lnhr, log-normalized hazard ratio.

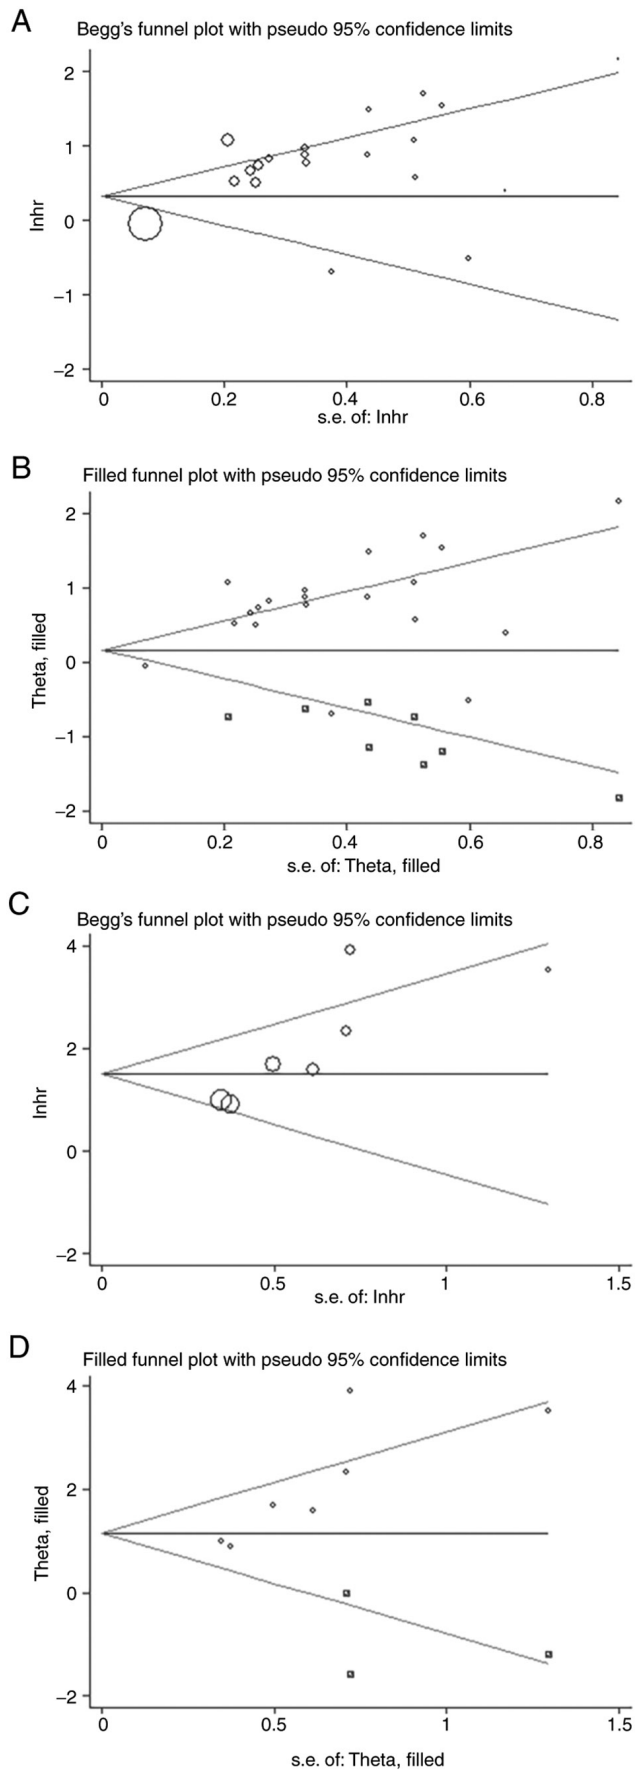

Supplement: Supplementary file 1 [file downloadSupplementary]
